# Supplementary material for: Perceptions of Trauma-Informed Care: The Experiences of Minor Sex Trafficking Survivors in Medical Settings
Source: Research Square preprint supplement (doi:10.21203/rs.3.rs-8098953/v1), 2025-12-02
Supplement: Supplementary file 1 [file 99379460ea8e8c6091af855a.docx]

**Appendix A**

Physical and Psychological Health Consequences of Minor Sex Trafficking

Qualitative Interview Questions

1. Date of interview: __________________________________________ (mm/dd/yyyy)
2. Interview Location: ____________________
3. Interviewer Initials: __________________________________________

Hello, my name is­­­­­­­­­____________________ and I work with _____________*.* We are conducting a research study with a team led by Northeastern University to understand the health care concerns of people who have experienced exploitation/sex trafficking and to learn more about how they get their medical and health care needs met. There is no obligation to take part in this interview. If you do participate your privacy will be protected, you will not be personally identified in any way. The interview will take about one hour of your time. The primary goal of this study is to gather information to improve services to meet the health care needs to people who have experienced victimization. [*Review verbal consent form*] Do you have any questions about the study or your participation?

***I am going to start with some questions that pertain to your experiences as a youth prior to experiencing exploitation. I am then going to ask you similar questions about the time when you were experiencing exploitation and then I will ask those questions about your experience after leaving a situation of exploitation through today.***

- When you think back to the time during your youth before experiencing exploitation, did you have any health concerns?
- *Possible prompt: Please consider mental health, physical health, and/or sexual health when you are answering.*
- *Follow-up: Did you receive any services for these concerns, such as having a doctor’s appointments, service referrals, or regular therapy?*
- *Follow-up where did you learn about options that were available to you to meet your healthcare needs during this time?*
- *Follow-up: (If yes) Where those services helpful? Did you feel as though your medical needs were met?*
- *Follow-up Was your experience at with the individual providing services positive? For example, did you feel seen, heard, and understood?*
- Were there any people or agencies that helped to facilitate your access to health care services?
- During this time:
  - Were there any people or agencies that got in the way or created barriers to your accessing health care services?
  - Did you experience any financial barriers to accessing health care?
  - Did you experience any structural barriers to accessing health care such as no access in the area or no services for people your age?
  - Did you experience any cognitive barriers such as language, cultural discrimination, or lack of health literacy?
  - Did you experience any psychological barriers such as mistrust of health services, fear or hopelessness?
- During the time of your exploitation did you have any health concerns?
- *Possible prompt: Please consider mental health, physical health, and/or sexual health when you are answering.*
- *Follow-up: Did you receive any services for these concerns, such as having a doctor’s appointments, service referrals, or regular therapy?*
- *Follow-up where did you learn about options that were available to you to meet your healthcare needs during this time?*
- *Follow-up: (If yes) Where those services helpful? Did you feel as though your medical needs were met?*
- *Follow-up Was your experience at with the individual providing services positive? For example, did you feel seen, heard, and understood?*
- During this time:
  - Were there any people or agencies that got in the way or created barriers to your accessing health care services?
  - Did you experience any financial barriers to accessing health care?
  - Did you experience any structural barriers to accessing health care such as no access in the area or no services for people your age?
  - Did you experience any cognitive barriers such as language, cultural discrimination, or lack of health literacy?
  - Did you experience any psychological barriers such as mistrust of health services, fear or hopelessness?
- In the time since you have been out of any situation of exploitation and through today, have you had any health concerns?
- *Possible prompt: Please consider mental health, physical health, and/or sexual health when you are answering.*
- *Follow-up: Did you receive any services for these concerns, such as having a doctor’s appointments, service referrals, or regular therapy?*
- *Follow-up where did you learn about options that were available to you to meet your healthcare needs during this time?*
- *Follow-up: (If yes) Where those services helpful? Did you feel as though your medical needs were met?*
- *Follow-up Was your experience at with the individual providing services positive? For example, did you feel seen, heard, and understood?*
- During this time:
  - Were there any people or agencies that got in the way or created barriers to your accessing health care services?
  - Did you experience any financial barriers to accessing health care?
  - Did you experience any structural barriers to accessing health care such as no access in the area or no services for people your age?
  - Did you experience any cognitive barriers such as language, cultural discrimination, or lack of health literacy?
  - Did you experience any psychological barriers such as mistrust of health services, fear or hopelessness?
- When you think about your time both before and after exploitation, what types of health care services have you tried to access? Tell me a little about your experiences with each of the below:
  1. Primary health care/routine visits
  2. Urgent care
  3. Specialty care (e.g., OB/GYN, optometrist)
  4. Mental health providers (e.g., therapist, psychiatrist)
- *Possible prompt: Can you tell me a little bit about how you contacted the provider? How you got their name/number?*
- *Possible prompt: How was your experience talking with the provider and/or their office staff? What was useful? What was not?*

- Were there times before, during or after your exploitation experience that you took care of health problems on your own – *self medicate, use home remedy?*
- Were there times before, during or after your exploitation experience that you received involuntary health care services?
- Have you had to fill prescriptions? If so, how has this process been? Have you encountered any challenges getting access to prescriptions you may need?
- What is important to you when looking for a clinic or health care provider?
- *Possible prompt: What are some things you look at first for a general practitioner? A specialist? A mental health provider?*
- Throughout your life, have there been any people or agencies that helped to facilitate your access to health care services?
- *Possible prompt: What did they do that was helpful? Was there anything that was done that was unhelpful, or made your access more difficult?*
- *Possible prompt: Looking back, is that anything that folks didn’t do, but would have been helpful?*
- How have the experiences you have had accessing health care or meeting your physical or psychological health needs as a youth impacted your health care security today?
- As an adult, do you face any long-term or continuing physical or psychological health problems as a result of your victimization?
- Do you have recommendations improving how we meet the healthcare needs of youth who may share your experiences today?
